# Supplementary material for: Analysis of the Prevalence of HTLV-1 Proviral DNA in Cervical Smears and Carcinomas from HIV Positive and Negative Kenyan Women
Source: MDPI journal article supplement (doi:10.3390/v8090245), 2016-09-05
Supplement: s1 [file s1]

## NCBI BLAST of Nested Tax Amplimer Sequences Shown in Supplementary Figure 4

### 1. Human T-lymphotropic virus 1 isolate LDAA\_04445\_IC tax protein (tax) and rex protein (rex) genes, partial cds

Sequence ID: [gb|KU680636.1](#) Length: 382 Number of Matches: 1

Related Information

Range 1: 199 to 367

| Score         | Expect                                                       | Identities    | Gaps      | Strand    |
|---------------|--------------------------------------------------------------|---------------|-----------|-----------|
| 313 bits(169) | 9e-82                                                        | 169/169(100%) | 0/169(0%) | Plus/Plus |
| Query 10      | CCACCCAGAGAACCTCTAAGACCCTCAAGGTCCTTACCCCGCCAATCACTCATACAACCC | 69            |           |           |
| Sbjct 199     | CCACCCAGAGAACCTCTAAGACCCTCAAGGTCCTTACCCCGCCAATCACTCATACAACCC | 258           |           |           |
| Query 70      | CCAACATTCCACCCTCCTTCTCCAGGCCATGCGCAAATACTCCCCCTTCCGAAATGGAT  | 129           |           |           |
| Sbjct 259     | CCAACATTCCACCCTCCTTCTCCAGGCCATGCGCAAATACTCCCCCTTCCGAAATGGAT  | 318           |           |           |
| Query 130     | ACATGGAACCCACCCTTGGGCAGCACCTCCCAACCCTGTCTTTTCCAGA            | 178           |           |           |
| Sbjct 319     | ACATGGAACCCACCCTTGGGCAGCACCTCCCAACCCTGTCTTTTCCAGA            | 367           |           |           |

### 2. Human T-lymphotropic virus 1 isolate LDAA\_04445\_IC tax protein (tax) and rex protein (rex) genes, partial cds

Sequence ID: [gb|KU680636.1](#) Length: 382 Number of Matches: 1

Related Information

Range 1: 202 to 367

| Score         | Expect                                                       | Identities   | Gaps      | Strand    |
|---------------|--------------------------------------------------------------|--------------|-----------|-----------|
| 302 bits(163) | 2e-78                                                        | 165/166(99%) | 0/166(0%) | Plus/Plus |
| Query 13      | CCCAGAGAACCTCTAAGACCCTCAAGGTCCTTACCCCGCCAATCACTCATACAACCCCAA | 72           |           |           |
| Sbjct 202     | CCCAGAGAACCTCTAAGACCCTCAAGGTCCTTACCCCGCCAATCACTCATACAACCCCAA | 261          |           |           |
| Query 73      | ACATTCCACCCTCCTTCTCCAGGCCATGCGCAAATACTCCCCCTTCCGAAATGGATACA  | 132          |           |           |
| Sbjct 262     | ACATTCCACCCTCCTTCTCCAGGCCATGCGCAAATACTCCCCCTTCCGAAATGGATACA  | 321          |           |           |
| Query 133     | TGGAACCCACCCTTGGGCAGCACCTCCCAACCCTGTCTTTTCCAGA               | 178          |           |           |
| Sbjct 322     | TGGAACCCACCCTTGGGCAGCACCTCCCAACCCTGTCTTTTCCAGA               | 367          |           |           |

### 3. Human T-lymphotropic virus 1 isolate LDAA\_04445\_IC tax protein (tax) and rex protein (rex) genes, partial cds

Sequence ID: [gb|KU680636.1](#) Length: 382 Number of Matches: 1

Related Information

Range 1: 203 to 367

| Score         | Expect                                                       | Identities   | Gaps      | Strand    |
|---------------|--------------------------------------------------------------|--------------|-----------|-----------|
| 257 bits(139) | 4e-65                                                        | 156/166(94%) | 2/166(1%) | Plus/Plus |
| Query 13      | CCAGAG-ACCTCTAANACCCTCAAGGNCCTTACCCCGCCAATCACTCATACCATNNCCAA | 71           |           |           |
| Sbjct 203     | CCAGAGAACCTCTAAGACCCTCAAGGTCCTTACCCCGCCAATCACTCATACAACCCCAA  | 262          |           |           |
| Query 72      | AAGTTCCACCCTCCTTCTCCAGGCCATGCGCAAATACTCTCCCTTCCGAAATGGATACA  | 131          |           |           |
| Sbjct 263     | CA-TTCCACCCTCCTTCTCCAGGCCATGCGCAAATACTCCCCCTTCCGAAATGGATACA  | 321          |           |           |
| Query 132     | TGGAACCCACCCTTGGGCAGCACCTCCCAACCCTGTCTTTTCCAGA               | 177          |           |           |
| Sbjct 322     | TGGAACCCACCCTTGGGCAGCACCTCCCAACCCTGTCTTTTCCAGA               | 367          |           |           |

#### 4. Human T-lymphotropic virus 1 isolate LDAA\_04733\_IC tax protein (tax) and rex protein (rex) genes, partial cds

Sequence ID: [gb|KU680637.1](#) Length: 382 Number of Matches: 1

Related Information

Range 1: 189 to 367

| Score         | Expect                                                       | Identities   |  | Gaps      | Strand    |
|---------------|--------------------------------------------------------------|--------------|--|-----------|-----------|
| 190 bits(210) | 7e-45                                                        | 151/180(84%) |  | 4/180(2%) | Plus/Plus |
| Query 2       | CCCTCCTTCCCC--CCAGAGAACCTCTAANACCCNTACCGNCGTTGCCCCGCCAATCACT | 59           |  |           |           |
| Sbjct 189     | CCCTCCTTCCCCACCCAGAGAACCTCTAAGACCCTTAAAGTCCTTACCCCGCCAATCACT | 248          |  |           |           |
| Query 60      | NATACCAACCANGGAAGNGCCACACTCCTTCCTCCAGGCCATGNGCAAATACCCCCCTT  | 119          |  |           |           |
| Sbjct 249     | CATAC-AACCCCCAACATTCCACCCTCCTTCCTCCAGGCCATGCGCAAATACTCCCCCTT | 307          |  |           |           |
| Query 120     | CCCAATGGATACATGGAA-CTACCCTTGGGCAGCACCTTTCAACCCTGTCTTTCCCCGA  | 178          |  |           |           |
| Sbjct 308     | CCGAAATGGATACATGGAACCCACCCTTGGGCAGCACCTCCAACCCTGTCTTTTCCAGA  | 367          |  |           |           |

#### 5. Human T-lymphotropic virus 1 isolate LDAA\_03998\_IC tax protein (tax) and rex protein (rex) genes, partial cds

Sequence ID: [gb|KU680633.1](#) Length: 382 Number of Matches: 1

Related Information

Range 1: 199 to 367

| Score         | Expect                                                       | Identities   |  | Gaps      | Strand    |
|---------------|--------------------------------------------------------------|--------------|--|-----------|-----------|
| 275 bits(304) | 2e-70                                                        | 163/170(96%) |  | 1/170(0%) | Plus/Plus |
| Query 8       | CCACCCAGAGAACCTCTAAGACCCTTAAGGTCCTTACCCCGCCAATCACTCATACCANNC | 67           |  |           |           |
| Sbjct 199     | CCACCCAGAGAACCTCTAAGACCCTTAAGGTCCTTACCCCGCCAATCACTCATACAACCC | 258          |  |           |           |
| Query 68      | naaaaaaTTCCACCCTCCTTCCTCCAGGCCATGCGCAAATACTCCCCCTTCCGAAATGGA | 127          |  |           |           |
| Sbjct 259     | CCAACA-TTCCACCCTCCTTCCTCCAGGCCATGCGCAAATACTCCCCCTTCCGAAATGGA | 317          |  |           |           |
| Query 128     | TACATGGAACCCACCCTTGGGCAGCACCTCCAACCCTGTCTTTTCCAGA            | 177          |  |           |           |
| Sbjct 318     | TACATGGAACCCACCCTTGGGCAGCACCTCCAACCCTGTCTTTTCCAGA            | 367          |  |           |           |

#### 6. Human T-lymphotropic virus 1 isolate BRSP217-12 tax protein (tax) gene, partial cds

Sequence ID: [gb|KT351510.1](#) Length: 996 Number of Matches: 1

Related Information

Range 1: 173 to 345

| Score         | Expect                                                       | Identities   |  | Gaps      | Strand    |
|---------------|--------------------------------------------------------------|--------------|--|-----------|-----------|
| 152 bits(168) | 2e-33                                                        | 141/175(81%) |  | 8/175(4%) | Plus/Plus |
| Query 6       | CCACCAAAGANCC-CTAAGACCCTCCAGGTCCTTATAACGC-AATTACTCATANANANC  | 63           |  |           |           |
| Sbjct 173     | CCACCCAGAGAACCTCTAAGACCCTCAAGGTCCTTACCCCGCCAATCACTCATACAACCC | 232          |  |           |           |
| Query 64      | NCGA-ANNCNACCCTTTTT--TCAAGGC-ATGCGCAAANATTCCATNAATTCCGAAATGG | 119          |  |           |           |
| Sbjct 233     | CCAACATTCCACCCTCCTTCCTCCAGGCCATGCGCAAATACTCCCC--TTCCGAAATGG  | 290          |  |           |           |
| Query 120     | ATACATGGAACCCACCCTTGGGCAGCACCTCCAACCCTGTCTTTCCAGAACCC        | 174          |  |           |           |
| Sbjct 291     | ATACATGGAACCCACCCTTGGGCAGCACCTCCAACCCTGTCTTTCCAGACCCC        | 345          |  |           |           |

## 7. Human T-lymphotropic virus 1 isolate LDAA\_04272\_IC tax protein (tax) and rex protein (rex) genes, partial cds

Sequence ID: [gb|KU680634.1](#) Length: 382 Number of Matches: 1

Related Information

Range 1: 200 to 367

| Score         | Expect                                                       | Identities    | Gaps      | Strand    |
|---------------|--------------------------------------------------------------|---------------|-----------|-----------|
| 304 bits(336) | 4e-79                                                        | 168/168(100%) | 0/168(0%) | Plus/Plus |
| Query 1       | CACCCAGAGAACCTCTAAGACCCTCAAGGTCCTTACCCCGCCAATCACTCATACAACCCC |               |           | 60        |
| Sbjct 200     | CACCCAGAGAACCTCTAAGACCCTCAAGGTCCTTACCCCGCCAATCACTCATACAACCCC |               |           | 259       |
| Query 61      | CAACATTCCACCCTCCTTCCTCCAGGCCATGCGCAAATACTCCCCCTCCGAAATGGATA  |               |           | 120       |
| Sbjct 260     | CAACATTCCACCCTCCTTCCTCCAGGCCATGCGCAAATACTCCCCCTCCGAAATGGATA  |               |           | 319       |
| Query 121     | CATGGAACCCACCCTTGGGCAGCACCTCCCAACCCTGTCTTTTCCAGA             |               | 168       |           |
| Sbjct 320     | CATGGAACCCACCCTTGGGCAGCACCTCCCAACCCTGTCTTTTCCAGA             |               | 367       |           |

## 8. Human T-lymphotropic virus 1 isolate LDAA\_02481\_IC tax protein (tax) and rex protein (rex) genes, partial cds

Sequence ID: [gb|KU680629.1](#) Length: 382 Number of Matches: 1

Related Information

Range 1: 282 to 371

| Score         | Expect                                                      | Identities | Gaps     | Strand    |
|---------------|-------------------------------------------------------------|------------|----------|-----------|
| 125 bits(138) | 3e-25                                                       | 84/92(91%) | 3/92(3%) | Plus/Plus |
| Query 85      | CAGGCC-TGCGCAAACCCCCcnnGGTTTCGAAATGGATACATGGAACCCACCCTTGGGC |            |          | 143       |
| Sbjct 282     | CAGGCCATGCGCAAACACTCCCC--TTCCGAAATGGATACATGGAACCCACCCTTGGGC |            |          | 339       |
| Query 144     | AGCACCTCCCAACCCTGTCTTTTCCAGAACCC                            |            | 175      |           |
| Sbjct 340     | AGCACCTCCCAACCCTGTCTTTTCCAGACCC                             |            | 371      |           |

## 9. Human T-lymphotropic virus 1 isolate LDAA\_04445\_IC tax protein (tax) and rex protein (rex) genes, partial cds

Sequence ID: [gb|KU680636.1](#) Length: 382 Number of Matches: 1

Related Information

Range 1: 188 to 367

| Score         | Expect                                                       | Identities   | Gaps      | Strand    |
|---------------|--------------------------------------------------------------|--------------|-----------|-----------|
| 315 bits(348) | 3e-82                                                        | 179/181(99%) | 1/181(0%) | Plus/Plus |
| Query 1       | CCCCTCCTTccccnccccAGAGAACCTCTAAGACCCTCAAGGTCCTTACCCCGCCAATCA |              |           | 60        |
| Sbjct 188     | CCCCTCCTTCCCCACCC-AGAGAACCTCTAAGACCCTCAAGGTCCTTACCCCGCCAATCA |              |           | 246       |
| Query 61      | CTCATACAACCCCCAACATTCCACCCTCCTTCCTCCAGGCCATGCGCAAATACTCCCCCT |              |           | 120       |
| Sbjct 247     | CTCATACAACCCCCAACATTCCACCCTCCTTCCTCCAGGCCATGCGCAAATACTCCCCCT |              |           | 306       |
| Query 121     | TCCGAAATGGATACATGGAACCCACCCTTGGGCAGCACCTCCCAACCCTGTCTTTTCCAG |              |           | 180       |
| Sbjct 307     | TCCGAAATGGATACATGGAACCCACCCTTGGGCAGCACCTCCCAACCCTGTCTTTTCCAG |              |           | 366       |
| Query 181     | A 181                                                        |              |           |           |
| Sbjct 367     | A 367                                                        |              |           |           |

### 10. Human T-lymphotropic virus 1 strain BRRJ3476 tax protein (tax) gene, partial cds

Sequence ID: [gb|DQ323834.1](#)|Length: 1000Number of Matches: 1

Related Information

Range 1: 208 to 374

| Score         | Expect                                                        | Identities   | Gaps       | Strand    |
|---------------|---------------------------------------------------------------|--------------|------------|-----------|
| 147 bits(162) | 8e-32                                                         | 135/169(80%) | 10/169(5%) | Plus/Plus |
| Query 16      | AGAGAACCTCTCAGACNNTNA-GGNTCTTACCCCGTCCAATCACTCATAANNCCCCGCAN  | 74           |            |           |
| Sbjct 208     | AGAGAACCTCTAAGACCCTCAAGGGCCTTACCCCG-CCAATCACTCATAACAACCCCGAAC | 266          |            |           |
| Query 75      | NTAACTC-----TTCTCCAGGC-ATGCGGAAANAATCTCAAATTCGAAATGGATACAT    | 127          |            |           |
| Sbjct 267     | ATTCCACCCTCCTTCTCCAGGCCATGCGCAAATACTCCCCC-TTCCGAAATGGATACAT   | 325          |            |           |
| Query 128     | GGAACCCACCCTTGGGCAGTACCTCCCAACCCTGTCTTTTCCAGAACCC             | 176          |            |           |
| Sbjct 326     | GGAACCCACCCTTGGGCAGCACCTCCCAACCCTGTCTTTTCCAGACCCC             | 374          |            |           |

### 11. Human T-lymphotropic virus 1 isolate LDAA\_04445\_IC tax protein (tax) and rex protein (rex) genes, partial cds

Sequence ID: [gb|KU680636.1](#)|Length: 382Number of Matches: 1

Related Information

Range 1: 192 to 367

| Score         | Expect                                                       | Identities   | Gaps      | Strand    |
|---------------|--------------------------------------------------------------|--------------|-----------|-----------|
| 289 bits(320) | 1e-74                                                        | 170/176(97%) | 1/176(0%) | Plus/Plus |
| Query 1       | TCCTTCCC-ACCCAGAGAACCTCTAAGACCCTCAAGGTCCTTACCCCGCCAATCACTCAT | 59           |           |           |
| Sbjct 192     | TCCTTCCCCACCCAGAGAACCTCTAAGACCCTCAAGGTCCTTACCCCGCCAATCACTCAT | 251          |           |           |
| Query 60      | ACANNAACCAAAATTCCACCCTCCTTCTCCAGGCCATGCGCAAATACTCCCCCTTCCGA  | 119          |           |           |
| Sbjct 252     | ACAACCCCCAACATTCACCCTCCTTCTCCAGGCCATGCGCAAATACTCCCCCTTCCGA   | 311          |           |           |
| Query 120     | AATGGATACATGGAACCCACCCTTGGGCAGCACCTCCCAACCCTGTCTTTTCCAGA     | 175          |           |           |
| Sbjct 312     | AATGGATACATGGAACCCACCCTTGGGCAGCACCTCCCAACCCTGTCTTTTCCAGA     | 367          |           |           |

### 12. Human T-lymphotropic virus 1 isolate LDAA\_04733\_IC tax protein (tax) and rex protein (rex) genes, partial cds

Sequence ID: [gb|KU680637.1](#)|Length: 382Number of Matches: 1

Related Information

Range 1: 303 to 367

| Score         | Expect                                                       | Identities | Gaps     | Strand    |
|---------------|--------------------------------------------------------------|------------|----------|-----------|
| 66.2 bits(72) | 5e-08                                                        | 53/65(82%) | 0/65(0%) | Plus/Plus |
| Query 5       | CCATTTCGAAATGGATACATGGAACNTCNNTTGGGCAGGAACCTTTAACCCTGGCTTTT  | 64         |          |           |
| Sbjct 303     | CCCTTCCGAAATGGATACATGGAACCCACCCTTGGGCAGCACCTCCCAACCCTGTCTTTT | 362        |          |           |
| Query 65      | CCAGA 69                                                     |            |          |           |
| Sbjct 363     | CCAGA 367                                                    |            |          |           |

16. Human T-lymphotropic virus 1 isolate LDAA\_04445\_IC tax protein (tax) and rex protein (rex) genes, partial cds

Sequence ID: [gb|KU680636.1](#) Length: 382 Number of Matches: 1

Related Information  
Range 1: 198 to 367

| Score         | Expect                                                        | Identities   | Gaps      | Strand    |
|---------------|---------------------------------------------------------------|--------------|-----------|-----------|
| 295 bits(326) | 2e-76                                                         | 168/170(99%) | 1/170(0%) | Plus/Plus |
| Query 7       | CCCACCCAGAGANC-TCTAAGACCCTCAAGGTCCTTACCCCGCCAATCACTCATAACAACC | 65           |           |           |
| Sbjct 198     | CCCACCCAGAGAACCTCTAAGACCCTCAAGGTCCTTACCCCGCCAATCACTCATAACAACC | 257          |           |           |
| Query 66      | CCCAACATTCCACCCTCCTTCCTCCAGGCCATGCGCAAATACTCCCCCTTCCGAAATGGA  | 125          |           |           |
| Sbjct 258     | CCCAACATTCCACCCTCCTTCCTCCAGGCCATGCGCAAATACTCCCCCTTCCGAAATGGA  | 317          |           |           |
| Query 126     | TACATGGAACCCACCCTTGGGCAGCACCTCCCAACCCTGTCTTTTCCAGA            | 175          |           |           |
| Sbjct 318     | TACATGGAACCCACCCTTGGGCAGCACCTCCCAACCCTGTCTTTTCCAGA            | 367          |           |           |

### 17. Human T-lymphotropic virus 1 isolate LDAA\_04445\_IC tax protein (tax) and rex protein (rex) genes, partial cds

Sequence ID: [gb|KU680636.1](#) Length: 382 Number of Matches: 1

Related Information  
Range 1: 198 to 367

| Score         | Expect                                                        | Identities    | Gaps      | Strand    |
|---------------|---------------------------------------------------------------|---------------|-----------|-----------|
| 307 bits(340) | 4e-80                                                         | 170/170(100%) | 0/170(0%) | Plus/Plus |
| Query 5       | CCCACCCAGAGAACCTCTAAGACCCTCAAGGTCCTTACCCCGCCAATCACTCATAACAACC | 64            |           |           |
| Sbjct 198     | CCCACCCAGAGAACCTCTAAGACCCTCAAGGTCCTTACCCCGCCAATCACTCATAACAACC | 257           |           |           |
| Query 65      | CCCAACATTCCACCCTCCTTCCTCCAGGCCATGCGCAAATACTCCCCCTTCCGAAATGGA  | 124           |           |           |
| Sbjct 258     | CCCAACATTCCACCCTCCTTCCTCCAGGCCATGCGCAAATACTCCCCCTTCCGAAATGGA  | 317           |           |           |
| Query 125     | TACATGGAACCCACCCTTGGGCAGCACCTCCCAACCCTGTCTTTTCCAGA            | 174           |           |           |
| Sbjct 318     | TACATGGAACCCACCCTTGGGCAGCACCTCCCAACCCTGTCTTTTCCAGA            | 367           |           |           |

### 18. Human T-lymphotropic virus 1 isolate LDAA\_04272\_IC tax protein (tax) and rex protein (rex) genes, partial cds

Sequence ID: [gb|KU680634.1](#) Length: 382 Number of Matches: 1

Related Information  
Range 1: 200 to 367

| Score         | Expect                                                        | Identities    | Gaps      | Strand    |
|---------------|---------------------------------------------------------------|---------------|-----------|-----------|
| 304 bits(336) | 5e-79                                                         | 168/168(100%) | 0/168(0%) | Plus/Plus |
| Query 11      | CACCCAGAGAACCTCTAAGACCCTCAAGGTCCTTACCCCGCCAATCACTCATAACAACCCC | 70            |           |           |
| Sbjct 200     | CACCCAGAGAACCTCTAAGACCCTCAAGGTCCTTACCCCGCCAATCACTCATAACAACCCC | 259           |           |           |
| Query 71      | CAACATTCCACCCTCCTTCCTCCAGGCCATGCGCAAATACTCCCCCTTCCGAAATGGATA  | 130           |           |           |
| Sbjct 260     | CAACATTCCACCCTCCTTCCTCCAGGCCATGCGCAAATACTCCCCCTTCCGAAATGGATA  | 319           |           |           |
| Query 131     | CATGGAACCCACCCTTGGGCAGCACCTCCCAACCCTGTCTTTTCCAGA              | 178           |           |           |
| Sbjct 320     | CATGGAACCCACCCTTGGGCAGCACCTCCCAACCCTGTCTTTTCCAGA              | 367           |           |           |

### 19. Human T-lymphotropic virus 1 isolate LDAA\_03584\_IC tax protein (tax) and rex protein (rex) genes, partial cds

Sequence ID: [gb|KU680631.1|](#)Length: 382Number of Matches: 1  
Related Information  
Range 1: 189 to 367

| Score         | Expect                                                       | Identities   | Gaps      | Strand    |
|---------------|--------------------------------------------------------------|--------------|-----------|-----------|
| 320 bits(173) | 6e-84                                                        | 177/179(99%) | 1/179(0%) | Plus/Plus |
| Query 2       | CCCTCCTT-CNCACCCAGAGAACCTCTAAGACCCTCAAGGTCCTTACCCCGCCAATCACT | 60           |           |           |
| Sbjct 189     | CCCTCCTTCCCCACCCAGAGAACCTCTAAGACCCTCAAGGTCCTTACCCCGCCAATCACT | 248          |           |           |
| Query 61      | CATACAACCCCCAACATTCCACCCTCCTTCCTCCAGGCCATGCGCAAATACTCCCCCTTC | 120          |           |           |
| Sbjct 249     | CATACAACCCCCAACATTCCACCCTCCTTCCTCCAGGCCATGCGCAAATACTCCCCCTTC | 308          |           |           |
| Query 121     | CGAAATGGATACATGGAACCCACCCTTGGGCAGCACCTCCCAACCCTGTCTTTTCCAGA  | 179          |           |           |
| Sbjct 309     | CGAAATGGATACATGGAACCCACCCTTGGGCAGCACCTCCCAACCCTGTCTTTTCCAGA  | 367          |           |           |

## 20. Human T-lymphotropic virus 1 isolate LDAA\_04445\_IC tax protein (tax) and rex protein (rex) genes, partial cds

Sequence ID: [gb|KU680636.1|](#)Length: 382Number of Matches: 1  
Related Information  
Range 1: 190 to 367

| Score         | Expect                                                       | Identities   | Gaps      | Strand    |
|---------------|--------------------------------------------------------------|--------------|-----------|-----------|
| 316 bits(171) | 7e-83                                                        | 176/178(99%) | 2/178(1%) | Plus/Plus |
| Query 3       | CCT-CTT-CCCACCCAGAGAACCTCTAAGACCCTCAAGGTCCTTACCCCGCCAATCACTC | 60           |           |           |
| Sbjct 190     | CCTCCTTCCCCACCCAGAGAACCTCTAAGACCCTCAAGGTCCTTACCCCGCCAATCACTC | 249          |           |           |
| Query 61      | ATACAACCCCCAACATTCCACCCTCCTTCCTCCAGGCCATGCGCAAATACTCCCCCTTCC | 120          |           |           |
| Sbjct 250     | ATACAACCCCCAACATTCCACCCTCCTTCCTCCAGGCCATGCGCAAATACTCCCCCTTCC | 309          |           |           |
| Query 121     | GAAATGGATACATGGAACCCACCCTTGGGCAGCACCTCCCAACCCTGTCTTTTCCAGA   | 178          |           |           |
| Sbjct 310     | GAAATGGATACATGGAACCCACCCTTGGGCAGCACCTCCCAACCCTGTCTTTTCCAGA   | 367          |           |           |

## 21. Human T-lymphotropic virus 1 isolate LDAA\_04445\_IC tax protein (tax) and rex protein (rex) genes, partial cds

Sequence ID: [gb|KU680636.1|](#)Length: 382Number of Matches: 1  
Related Information  
Range 1: 185 to 367

| Score         | Expect                                                       | Identities   | Gaps      | Strand    |
|---------------|--------------------------------------------------------------|--------------|-----------|-----------|
| 311 bits(168) | 3e-81                                                        | 178/183(97%) | 3/183(1%) | Plus/Plus |
| Query 1       | ACT-CCNTCCTT-CCCACCCAGAG-ANCTCTAAGACCCTCAAGGTCCTTACCCCGCCAAT | 57           |           |           |
| Sbjct 185     | ACTCCCTCCTTCCCCACCCAGAGAACCTCTAAGACCCTCAAGGTCCTTACCCCGCCAAT  | 244          |           |           |
| Query 58      | CACTCATACAACCCCCAACATTCCACCCTCCTTCCTCCAGGCCATGCGCAAATACTCCCC | 117          |           |           |
| Sbjct 245     | CACTCATACAACCCCCAACATTCCACCCTCCTTCCTCCAGGCCATGCGCAAATACTCCCC | 304          |           |           |
| Query 118     | CTTCCGAAATGGATACATGGAACCCACCCTTGGGCAGCACCTCCCAACCCTGTCTTTTCC | 177          |           |           |
| Sbjct 305     | CTTCCGAAATGGATACATGGAACCCACCCTTGGGCAGCACCTCCCAACCCTGTCTTTTCC | 364          |           |           |
| Query 178     | AGA 180                                                      |              |           |           |
| Sbjct 365     | AGA 367                                                      |              |           |           |

## 22. Human T-lymphotropic virus 1 isolate LDAA\_04445\_IC tax protein (tax) and rex protein (rex) genes, partial cds

Sequence ID: [gb|KU680636.1](#) Length: 382 Number of Matches: 1

Related Information

Range 1: 187 to 367

| Score         | Expect                                                       | Identities   | Gaps      | Strand    |
|---------------|--------------------------------------------------------------|--------------|-----------|-----------|
| 322 bits(174) | 2e-84                                                        | 179/181(99%) | 2/181(1%) | Plus/Plus |
| Query 1       | TCCCTT-CTT-CCCACCCAGAGAACCTCTAAGACCCTCAAGGTCCTTACCCCGCCAATCA | 58           |           |           |
| Sbjct 187     | TCCCTTCTTCCCCACCCAGAGAACCTCTAAGACCCTCAAGGTCCTTACCCCGCCAATCA  | 246          |           |           |
| Query 59      | CTCATACAACCCCCAACATTCCACCCTCCTTCCTCCAGGCCATGCGCAAATACTCCCCCT | 118          |           |           |
| Sbjct 247     | CTCATACAACCCCCAACATTCCACCCTCCTTCCTCCAGGCCATGCGCAAATACTCCCCCT | 306          |           |           |
| Query 119     | TCCGAAATGGATACATGGAACCCACCCTTGGGCAGCACCTCCCAACCCTGTCTTTTCCAG | 178          |           |           |
| Sbjct 307     | TCCGAAATGGATACATGGAACCCACCCTTGGGCAGCACCTCCCAACCCTGTCTTTTCCAG | 366          |           |           |
| Query 179     | A 179                                                        |              |           |           |
| Sbjct 367     | A 367                                                        |              |           |           |

### 23. Human T-lymphotropic virus 1 isolate LDAA\_03584\_IC tax protein (tax) and rex protein (rex) genes, partial cds

Sequence ID: [gb|KU680631.1](#) Length: 382 Number of Matches: 1

Related Information

Range 1: 190 to 367

| Score         | Expect                                                       | Identities   | Gaps      | Strand    |
|---------------|--------------------------------------------------------------|--------------|-----------|-----------|
| 316 bits(171) | 7e-83                                                        | 176/178(99%) | 2/178(1%) | Plus/Plus |
| Query 2       | CCT-CTT-CCCACCCAGAGAACCTCTAAGACCCTCAAGGTCCTTACCCCGCCAATCACTC | 59           |           |           |
| Sbjct 190     | CCTCTTCCCCACCCAGAGAACCTCTAAGACCCTCAAGGTCCTTACCCCGCCAATCACTC  | 249          |           |           |
| Query 60      | ATACAACCCCCAACATTCCACCCTCCTTCCTCCAGGCCATGCGCAAATACTCCCCCTTCC | 119          |           |           |
| Sbjct 250     | ATACAACCCCCAACATTCCACCCTCCTTCCTCCAGGCCATGCGCAAATACTCCCCCTTCC | 309          |           |           |
| Query 120     | GAAATGGATACATGGAACCCACCCTTGGGCAGCACCTCCCAACCCTGTCTTTTCCAGA   | 177          |           |           |
| Sbjct 310     | GAAATGGATACATGGAACCCACCCTTGGGCAGCACCTCCCAACCCTGTCTTTTCCAGA   | 367          |           |           |

### 24. Human T-lymphotropic virus 1 isolate LDAA\_04272\_IC tax protein (tax) and rex protein (rex) genes, partial cds

Sequence ID: [gb|KU680634.1](#) Length: 382 Number of Matches: 1

Related Information

Range 1: 192 to 367

| Score         | Expect                                                       | Identities   | Gaps      | Strand    |
|---------------|--------------------------------------------------------------|--------------|-----------|-----------|
| 318 bits(172) | 2e-83                                                        | 175/176(99%) | 1/176(0%) | Plus/Plus |
| Query 1       | TCCTT-CCCACCCAGAGAACCTCTAAGACCCTCAAGGTCCTTACCCCGCCAATCACTCAT | 59           |           |           |
| Sbjct 192     | TCCTTCCCCACCCAGAGAACCTCTAAGACCCTCAAGGTCCTTACCCCGCCAATCACTCAT | 251          |           |           |
| Query 60      | ACAACCCCCAACATTCCACCCTCCTTCCTCCAGGCCATGCGCAAATACTCCCCCTTCCGA | 119          |           |           |
| Sbjct 252     | ACAACCCCCAACATTCCACCCTCCTTCCTCCAGGCCATGCGCAAATACTCCCCCTTCCGA | 311          |           |           |
| Query 120     | AATGGATACATGGAACCCACCCTTGGGCAGCACCTCCCAACCCTGTCTTTTCCAGA     | 175          |           |           |
| Sbjct 312     | AATGGATACATGGAACCCACCCTTGGGCAGCACCTCCCAACCCTGTCTTTTCCAGA     | 367          |           |           |

### 25. Human T-lymphotropic virus 1 isolate LDAA\_04445\_IC tax protein (tax) and rex protein (rex) genes, partial cds



Sequence ID: [gb|KU680636.1](#) Length: 382 Number of Matches: 1  
 Related Information  
 Range 1: 200 to 367

| Score         | Expect                                                       | Identities    | Gaps      | Strand    |
|---------------|--------------------------------------------------------------|---------------|-----------|-----------|
| 311 bits(168) | 3e-81                                                        | 168/168(100%) | 0/168(0%) | Plus/Plus |
| Query 1       | CACCCAGAGAACCTCTAAGACCCTCAAGGTCCTTACCCCGCCAATCACTCATACAACCCC | 60            |           |           |
| Sbjct 200     | CACCCAGAGAACCTCTAAGACCCTCAAGGTCCTTACCCCGCCAATCACTCATACAACCCC | 259           |           |           |
| Query 61      | CAACATTCCACCCTCCTTCCTCCAGGCCATGCGCAAATACTCCCCCTCCGAAATGGATA  | 120           |           |           |
| Sbjct 260     | CAACATTCCACCCTCCTTCCTCCAGGCCATGCGCAAATACTCCCCCTCCGAAATGGATA  | 319           |           |           |
| Query 121     | CATGGAACCCACCCTTGGGCAGCACCTCCCAACCCTGTCTTTTCCAGA             | 168           |           |           |
| Sbjct 320     | CATGGAACCCACCCTTGGGCAGCACCTCCCAACCCTGTCTTTTCCAGA             | 367           |           |           |

## 26. Human T-lymphotropic virus 1 isolate LDAA\_04445\_IC tax protein (tax) and rex protein (rex) genes, partial cds

Sequence ID: [gb|KU680636.1](#) Length: 382 Number of Matches: 1  
 Related Information  
 Range 1: 198 to 367

| Score         | Expect                                                       | Identities    | Gaps      | Strand    |
|---------------|--------------------------------------------------------------|---------------|-----------|-----------|
| 315 bits(170) | 2e-82                                                        | 170/170(100%) | 0/170(0%) | Plus/Plus |
| Query 1       | CCCACCCAGAGAACCTCTAAGACCCTCAAGGTCCTTACCCCGCCAATCACTCATACAACC | 60            |           |           |
| Sbjct 198     | CCCACCCAGAGAACCTCTAAGACCCTCAAGGTCCTTACCCCGCCAATCACTCATACAACC | 257           |           |           |
| Query 61      | CCCAACATTCCACCCTCCTTCCTCCAGGCCATGCGCAAATACTCCCCCTCCGAAATGGA  | 120           |           |           |
| Sbjct 258     | CCCAACATTCCACCCTCCTTCCTCCAGGCCATGCGCAAATACTCCCCCTCCGAAATGGA  | 317           |           |           |
| Query 121     | TACATGGAACCCACCCTTGGGCAGCACCTCCCAACCCTGTCTTTTCCAGA           | 170           |           |           |
| Sbjct 318     | TACATGGAACCCACCCTTGGGCAGCACCTCCCAACCCTGTCTTTTCCAGA           | 367           |           |           |

**These data show homology with the following HTLV-1 isolates:-**

14 x LDAA\_04445\_IC; 3 x LDAA\_04733\_IC; 1 x LDAA\_03998; 1 X BRSP217-12; 3 x LDAA\_04272\_IC; 1 x BRRJ3476; 1 x LDAA\_02481\_IC; 2 x LDAA\_03584\_IC
